# Supplementary material
Source: publisher site journal article supplement (https://www.spandidos-publications.com/1362/downloadSupplementary)

Figure S1. Effects of PLAG with co-treatment and pre-treatment. MDA-MB-231 breast cancer cells were pretreated with PLAG (50  $\mu$ g/ml) for 2 min or 1 h and then treated with EGF (100 ng/ml). The 2-min and 1-h pretreated cells were marked Co (co-treatment) and Pre (pre-treatment). Surface EGFR was analyzed by flow cytometry at 5 min after EGF treatment. Statistical significance was determined by ANOVA (Tukey's test). \*\*\*P<0.005, compared with the untreated group; ##P<0.01, compared with the EGF group. N.S., not significant; PLAG, 1-palmitoyl-2-linoleoyl-3-acetyl-rac-glycerol; EGF, epidermal growth factor; EGFR, epidermal growth factor receptor.

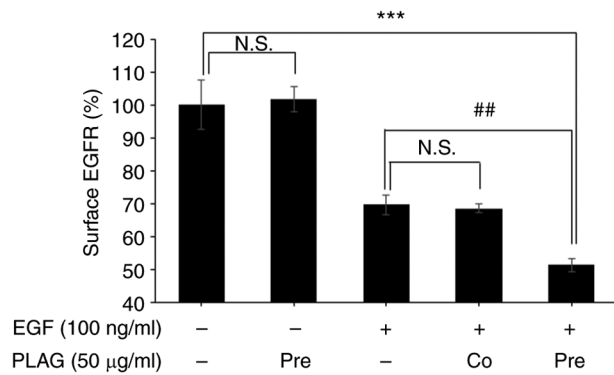

Supplement: Supplementary file 1 [file downloadSupplementary]
